# Supplementary material for: The Sensitivity of Structure to Ionic Radius and Reaction Stoichiometry. A Crystallographic Study of Metal Coordination and Hydrogen Bonding in Barbiturate Complexes of All Five Alkali Metals Li–Cs
Source: Preprints.org preprint supplement (doi:10.20944/preprints202403.0395.v1), 2024-03-08
Supplement: Supplementary file 4 [file supplementary]

The sensitivity of structure to ionic radius and reaction stoichiometry. A crystallographic study of metal coordination and hydrogen bonding in barbiturate complexes of all five alkali metals Li–Cs.

**William Clegg and Gary S. Nichol**

**Supplementary material**

**Table S1: CSD REFCODES for structures containing BA− as an uncoordinated discrete anion.**

AMBARB01

BENWUO

BUYYEA

BUYYIE

CUHBAL

CUHBEP

CUHBOZ

CUHBUF

CURKEH

CURKIL

ESICOB

ESIDES

ESOZOD

EVELAV

GATLEU

GATLIY

GIGQOD

HOLFET

JICWOH10

JICWOH11

JURLUG

KEDZAV

KEWSIR

KEWSOX

KINFIZ

KITGEC

LUXHAN

MUYTUW

MUYVEI

MUYVIM

NEBFUY

OQEPAD

OQOXOJ

OQOXUP

OYANUA

QAFSOF

QEPFIB

QEPFOH

SUYNIM

UFUWAW

WAGDIV

WOPLIY

ZABVAD
